# Supplementary material for: Aqueous Extracts of Three Herbs Allelopathically Inhibit Lettuce Germination but Promote Seedling Growth at Low Concentrations
Source: MDPI journal article supplement (doi:10.3390/plants11040486), 2022-02-11
Supplement: s1 [file s1]

## Supplementary Material

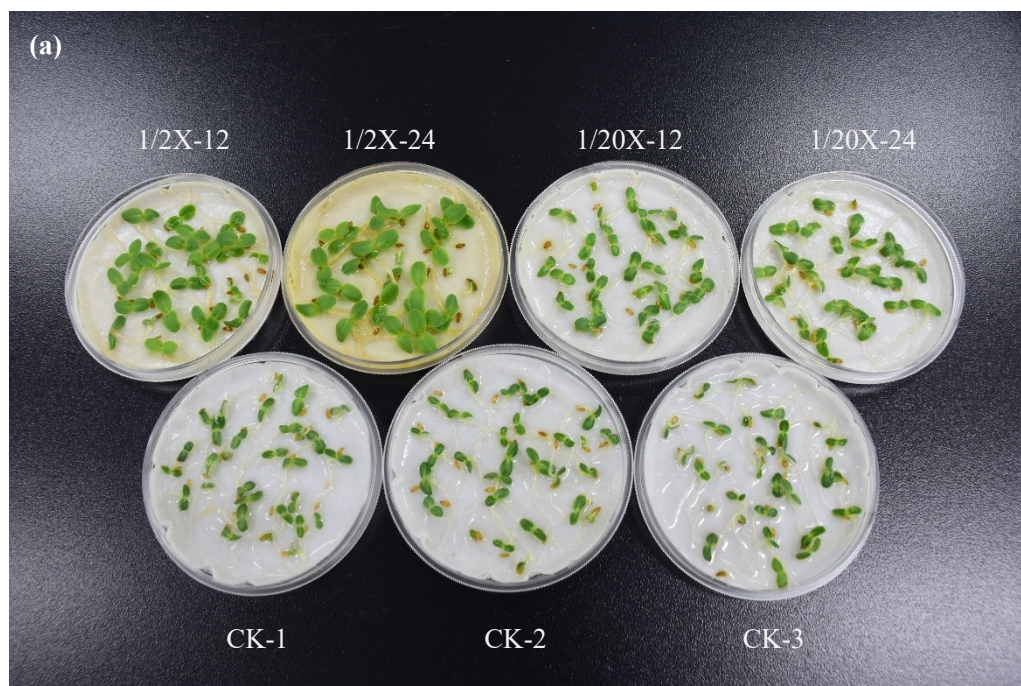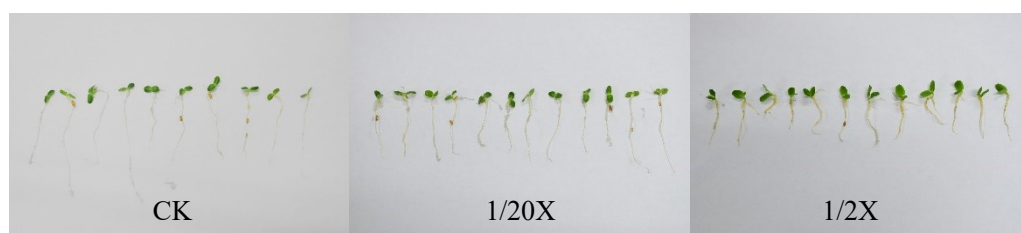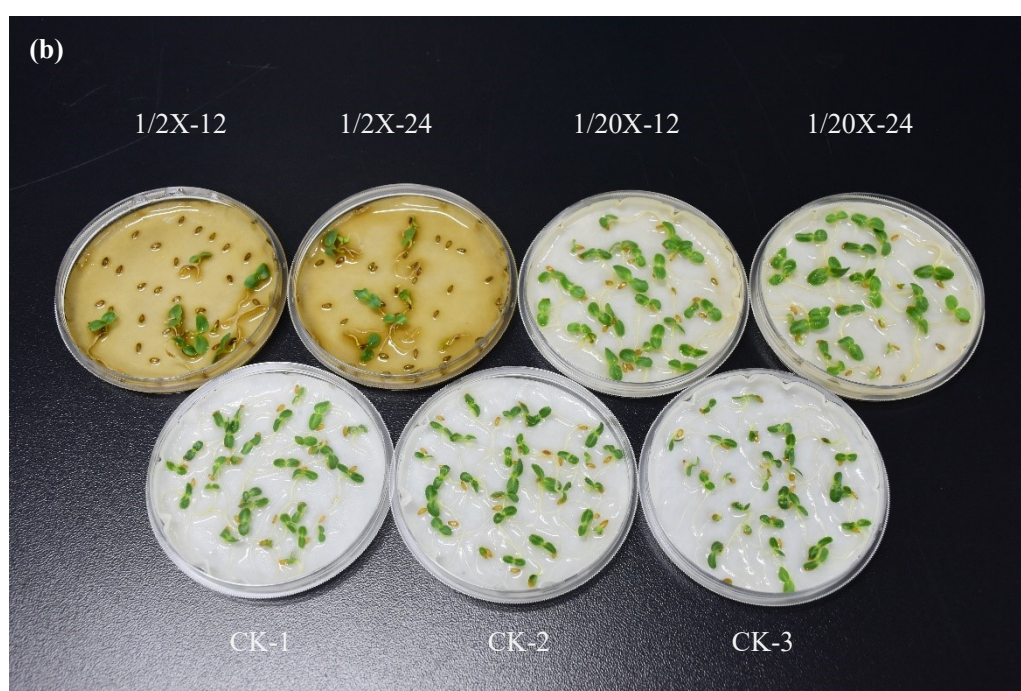

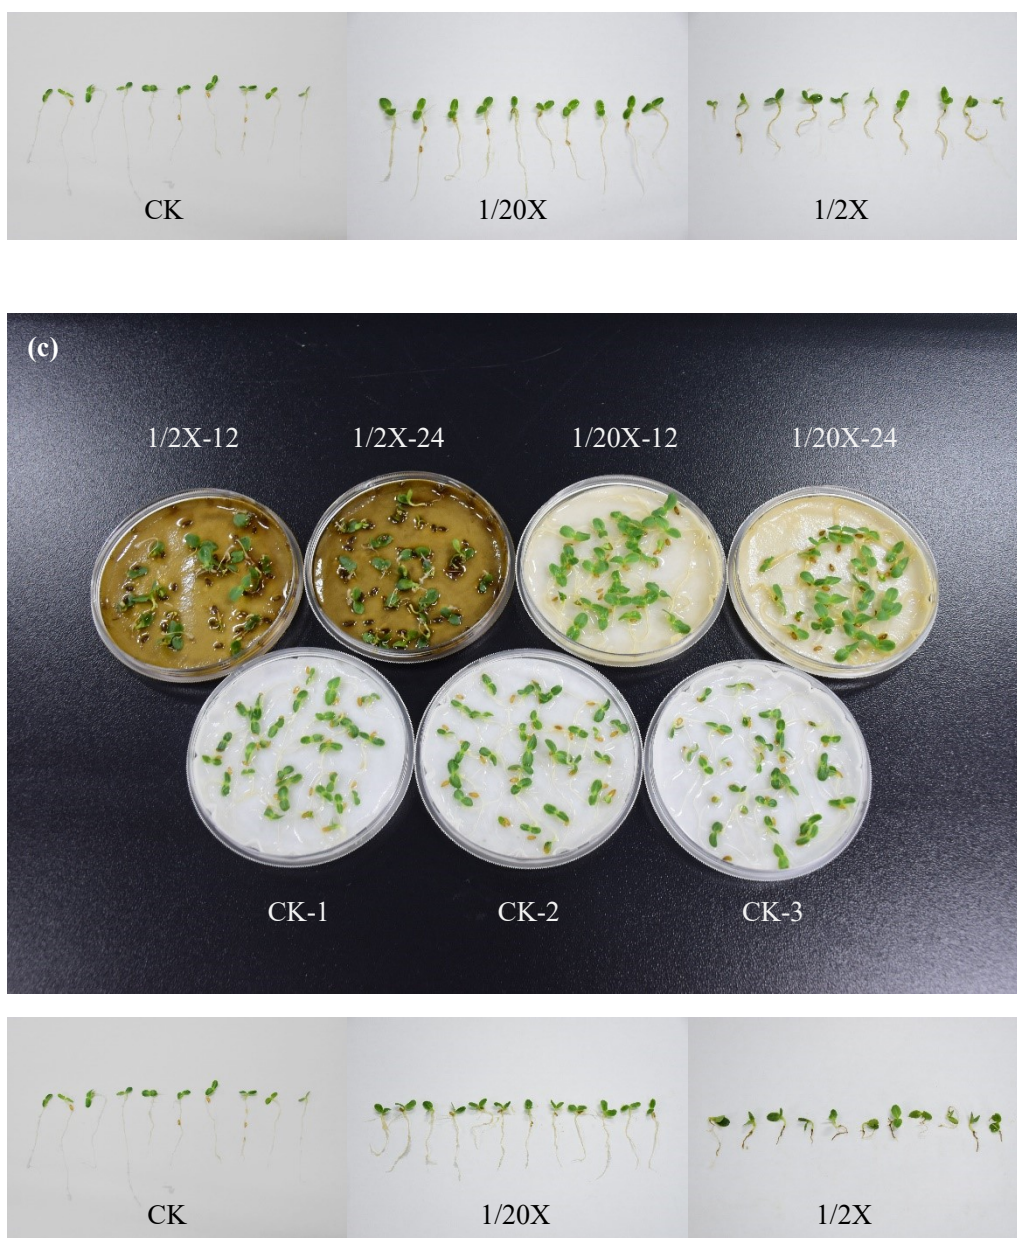

**Figure S1.** Photos of 4 donor plants aqueous extracts with different concentrations and soaking time on lettuce seed germination on the last day of the count. (a) *Achnatherum splendens*. (b) *Artemisia frigida*. (c) *Stellera chamaejasme*. 1/2X-12 represents extract concentration at  $0.05 \text{ g mL}^{-1}$  and soaking time about 12 h; 1/20X-24 represents extract concentration at  $0.005 \text{ g mL}^{-1}$  and soaking time about 24 h. The arranged seedlings were those under aqueous extract about 12 h soaking time.



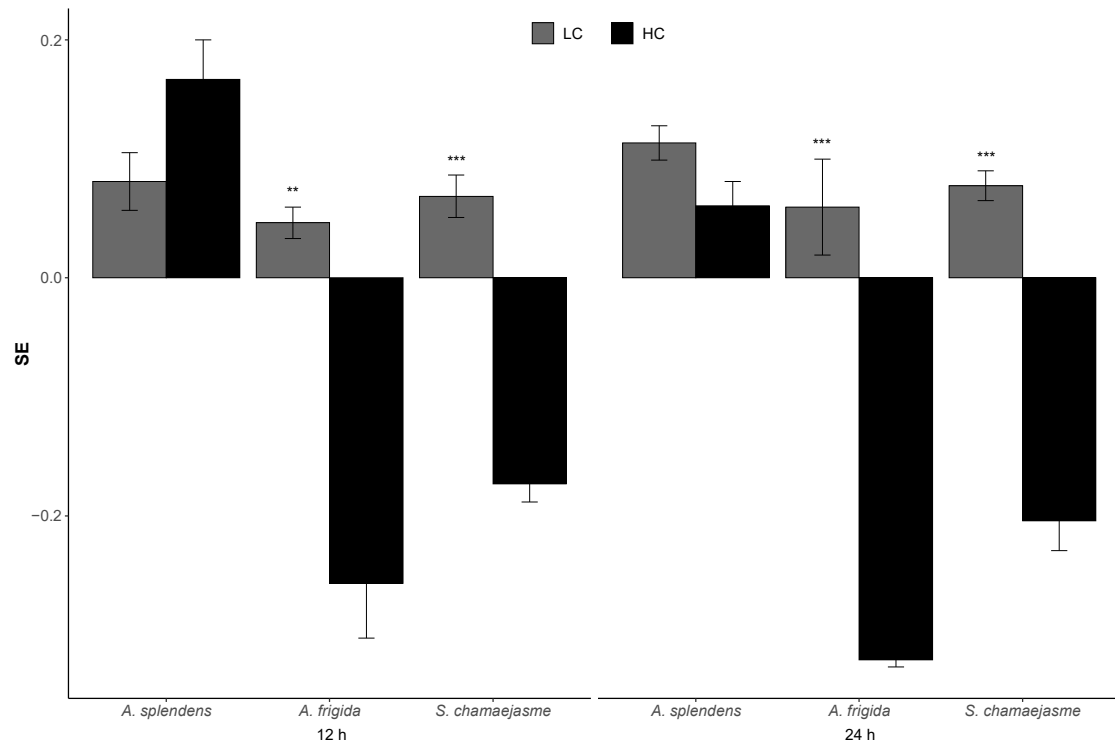

**Figure S2.** Effects of extract concentration and soaking time of three donor species-*A. splendens*, *A. frigida*, and *S. chamaejasme* on lettuce SE.  $SE = (RI_{GR} + RI_{SL} + RI_{RL} + RI_{SB} + RI_{RB})/5$ . Data are presented as mean  $\pm$  SE ( $n=36$ ). LC, low concentration (0.005 g mL<sup>-1</sup>). HC, high concentration (0.05 g mL<sup>-1</sup>). S, donor species. C, extract concentration. T, soaking time. \*P<0.05, \*\*P<0.01, \*\*\*P<0.001. There were no significant differences between the two soaking times with the Wilcoxon rank sum test ( $P>0.05$ ).
